# Supplementary material for: Pimenta dioica and Pimenta racemosa: GC-based metabolomics for the assessment of seasonal and organ variation in their volatile components, in silico and in vitro cytotoxic activity estimation
Source: Royal Society of Chemistry journal article supplement (doi:10.1039/d1fo00408e), 2021-01-01
Supplement: d1fo00408e1.pdf [file d1fo00408e1.pdf]

## Supplementary Data

### *Pimenta dioica* and *Pimenta racemosa*: GC-based metabolomics for the assessment of seasonal and organs variation in their volatile components, *in silico* and *in vitro* cytotoxic activity estimation

**Figure S1:** 2D interaction of chavicol in the binding sites of DNA topoisomerase II (TOP-2) (A), human cyclin-dependent kinase 2 (CDK-2) (B), and Matrix metalloproteinase 13 (MMP-13) (C) using *in silico* molecular modelling

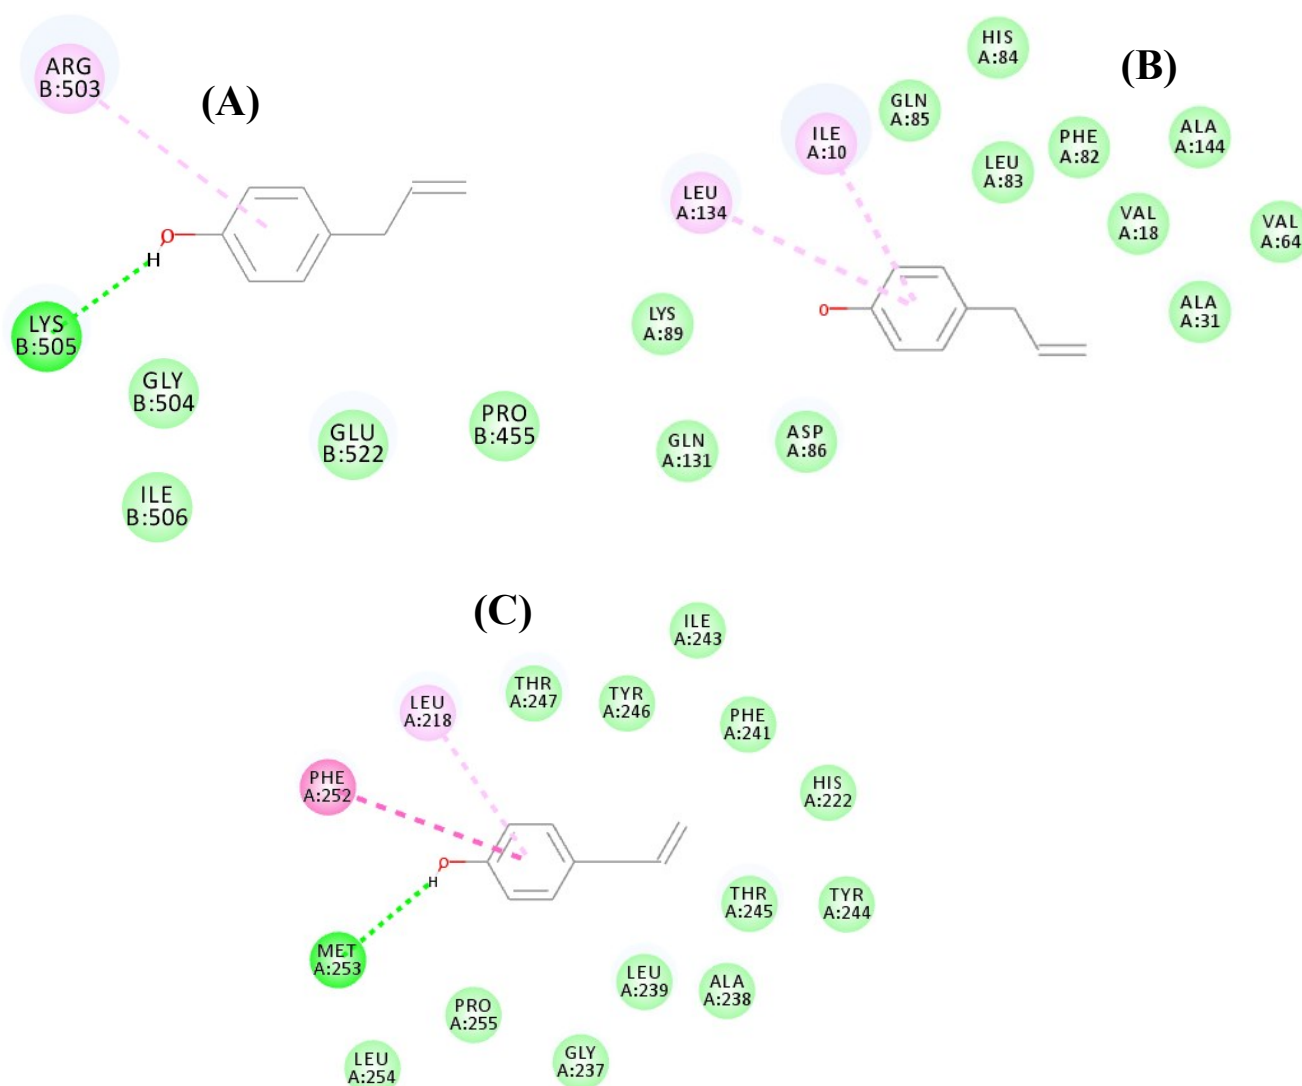

**Figure S1:** 2D interaction of chavicol in the binding sites of DNA topoisomerase II (TOP-2) (A), human cyclin-dependent kinase 2 (CDK-2) (B), and Matrix metalloproteinase 13 (MMP-13) (C) using *in silico* molecular modelling
